# Supplementary material for: A comparative analysis of DeepSeek R1, DeepSeek-R1-Lite, OpenAi o1 Pro, and Grok 3 performance on ophthalmology board-style questions
Source: Springer Nature journal article supplement (doi:10.1038/s41598-025-08601-2), 2025-07-02
Supplement: MOESM1 [file 41598_2025_8601_MOESM1_ESM.pdf]

1 **Supplementary Materials**

2 **Supplementary Figure S1**

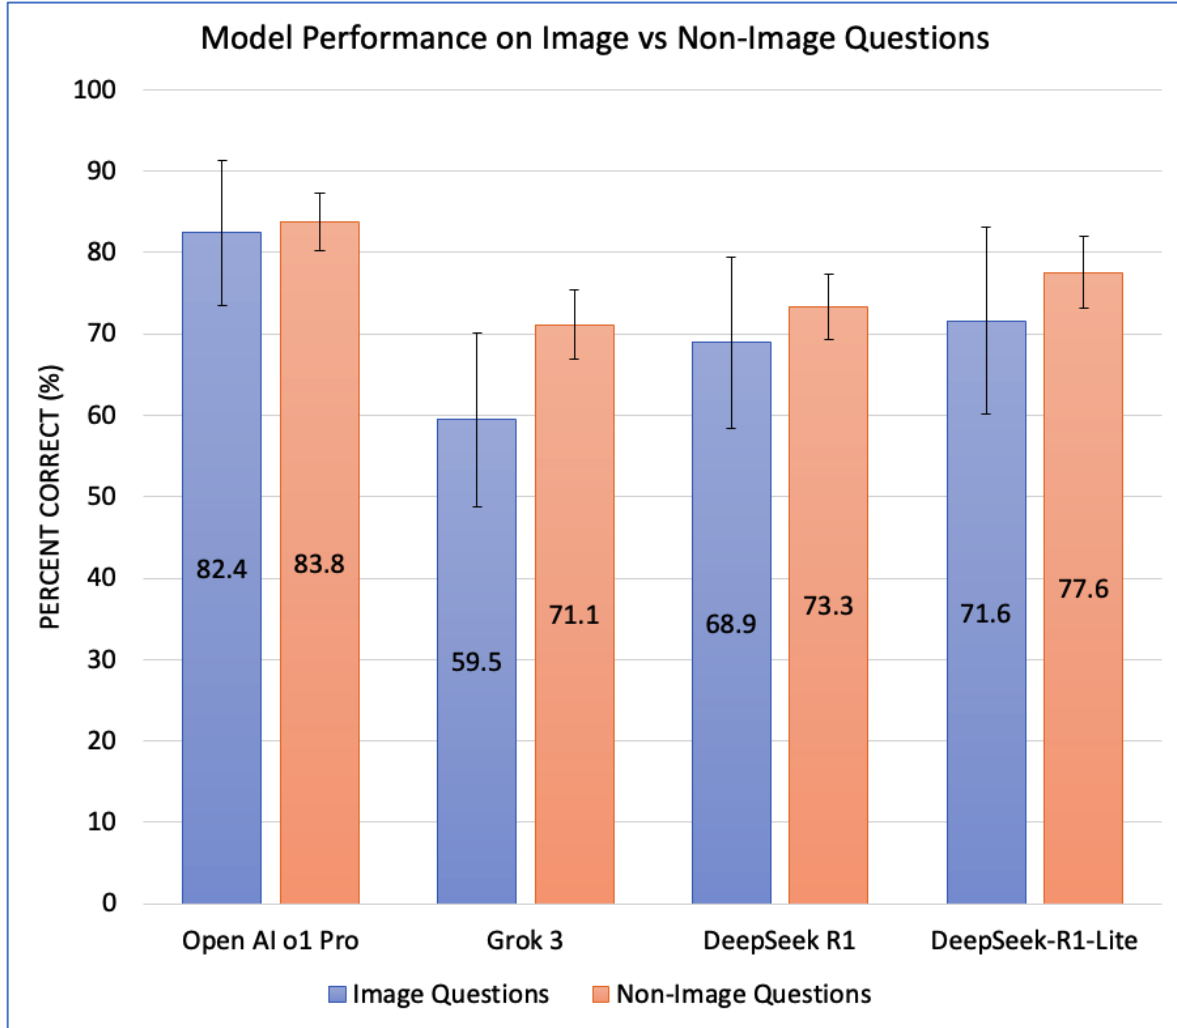

3

4

5

6

7

8

9 **Supplementary Figure S2**

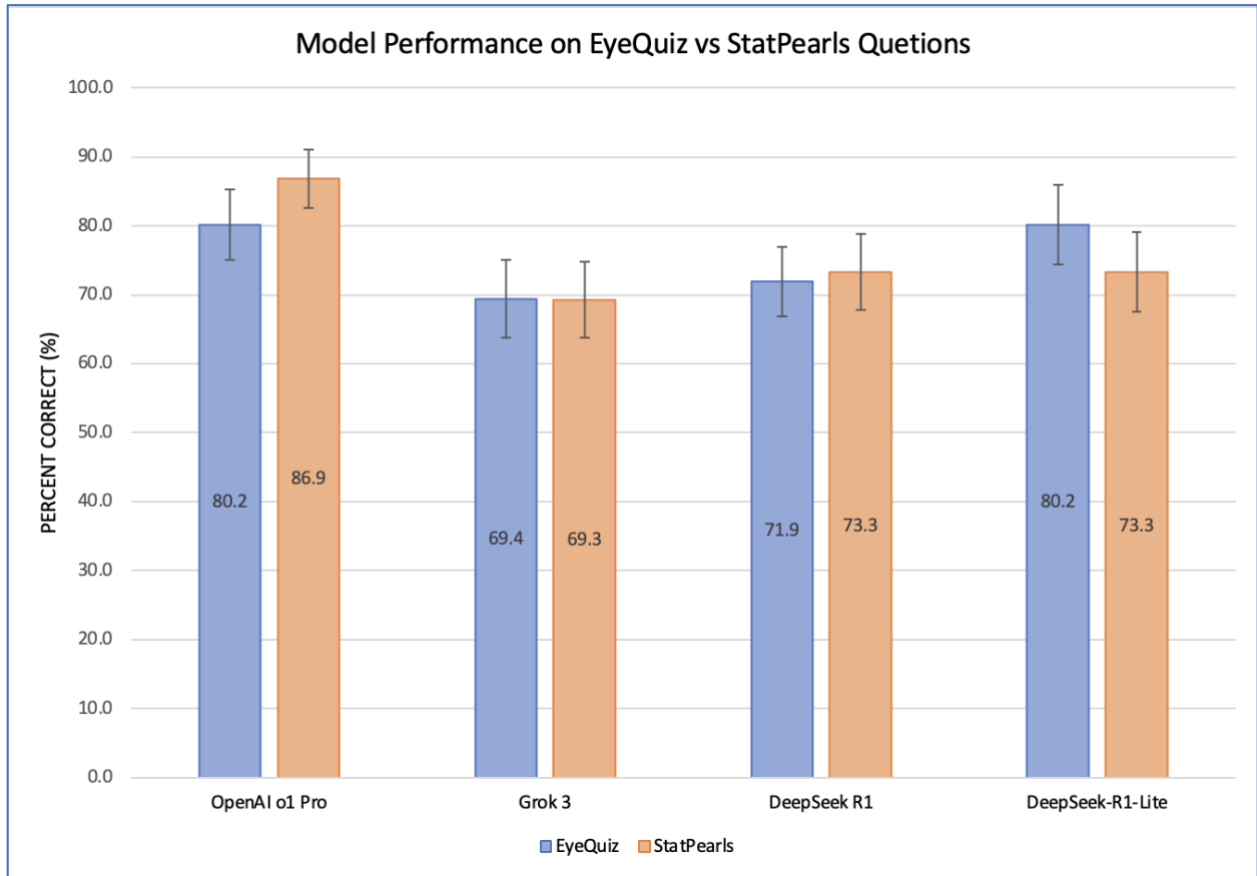

10

11

12

13

14

15

16

17

18

19

20

21 **Supplementary Figure S3**

| Questions                                                                                                                                                                                                                                                                                                                                                          | Correct Answer (from EyeQuiz or StatPearls) | Image (Include if image-based question) | Question Category | Taxonomy Category (1=First Order 2=Second 3=Third) | GPT-o1 Pro Answer | Grok 3 Answer | DeekSeek Lite Answer | DeepSeek R1 Answer | GPT-o1 pro, Correct? | DeekSeek R1, correct? | DeepSeek Lite, correct? | Grok 3, correct? |
|--------------------------------------------------------------------------------------------------------------------------------------------------------------------------------------------------------------------------------------------------------------------------------------------------------------------------------------------------------------------|---------------------------------------------|-----------------------------------------|-------------------|----------------------------------------------------|-------------------|---------------|----------------------|--------------------|----------------------|-----------------------|-------------------------|------------------|
| What is the approximate risk of retinal detachment overall in the 5 year period after a cataract surgery?<br>A. 1%<br>B. 2%<br>C. 5%<br>D. 10%                                                                                                                                                                                                                     | A                                           |                                         | 8                 | 1                                                  | A                 | B             | A                    | A                  | Match                | Match                 | Match                   | Not Match        |
| A 60 year old patient presents with complaints of decreased vision. On exam, you find severe anterior basement membrane dystrophy and cataract. Which of the following tests would be most helpful in determining the main cause of the vision change?<br>A. Contact lens overrefraction<br>B. Corneal topography<br>C. Glare testing<br>D. Potential acuity meter | A                                           |                                         | 1                 | 3                                                  | A                 | D             | C                    | D                  | Match                | Not Match             | Not Match               | Not Match        |
| Indications for surgical excision of a pterygium include which of the following?<br>A. Persistent irritation<br>B. Irregular astigmatism<br>C. Difficulty with contact lens wear<br>D. Limitation of gaze<br>E. Cosmesis                                                                                                                                           | A, B, C, D, E                               |                                         | 2                 | 2                                                  | A, B, C, D, E     | A, B, C, D, E | A, B, C, D, E        | A, B, D, E         | Match                | Not Match             | Match                   | Match            |

22

23

24

25

26

27

28

29

30

31

32

33

34

35

36

37

38

39 **Figure legends**

40 Supplementary Figure S1. Performance of OpenAI o1, Grok 3, DeepSeek R1, and DeepSeek-R1-Lite on  
41 *StatPearls* and *EyeQuiz* questions stratified by questions containing images and questions not containing  
42 images. 95% confidence intervals are included.

43 Supplementary Figure S2. Performance of OpenAI o1, Grok 3, DeepSeek R1, and DeepSeek-R1-Lite,  
44 stratified by *StatPearls* and *EyeQuiz* Question banks.

45 Supplementary Figure S3. Example question-and-answer pairs including responses from each model from  
46 *EyeQuiz* questions.

47
